# Supplementary material for: Aromatic Profile Variation of Essential Oil from Dried Makwhaen Fruit and Related Species
Source: MDPI journal article supplement (doi:10.3390/plants10040803), 2021-04-19
Supplement: s1 [file s1]

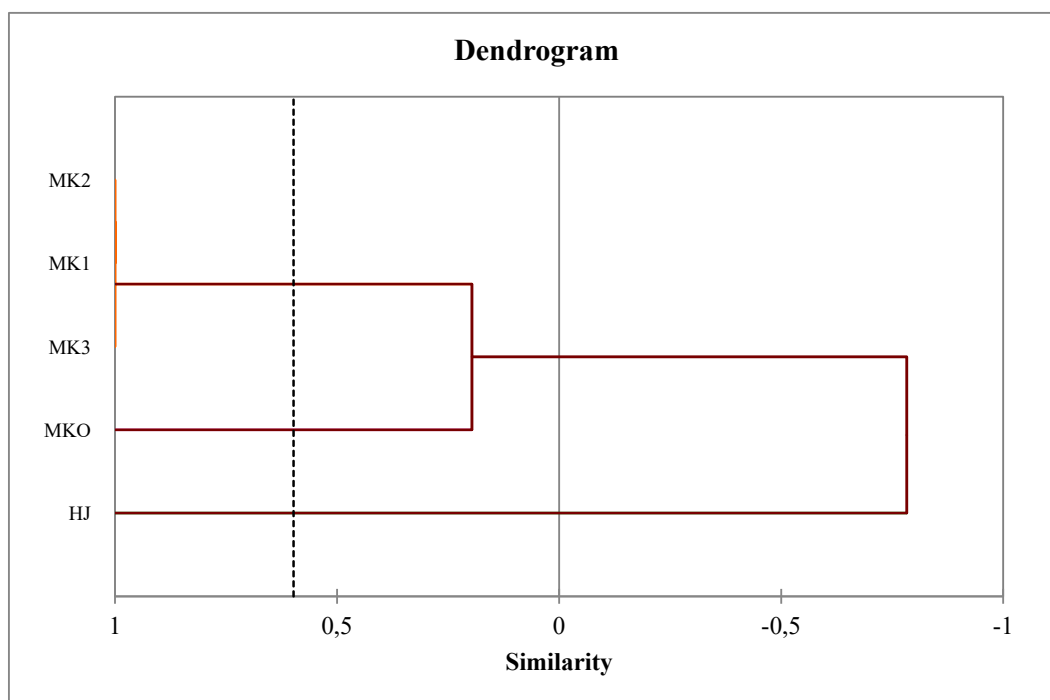

**Figure S1.** The dendrogram of *Zanthoxylum* spp. in North of Thailand; huajiao (HJ), makwhoung (MKO), MK1 (makhwaen from Mae Tang district), MK2 (makhwaen from Mae Rim district) and MK3 (makhwaen from Song Kwae district) derived by UPGMA from the similarity matrix based on seven morphology data (plant structure, thorn, compound leaf type, petals, anthers, fresh and dry fruit colour).

**Table S1**

Plant characteristics for taxonomical identification of collected *Zanthoxylum* spp. used in this experiment

| Part of Plant for classification | Common names                                                                        |                                                                                      |                                                                                       |
|----------------------------------|-------------------------------------------------------------------------------------|--------------------------------------------------------------------------------------|---------------------------------------------------------------------------------------|
|                                  | huajiao (HJ)                                                                        | makwoung (MKO)                                                                       | makhwaen (MK1-3)                                                                      |
| <b>Plant structure</b>           |    |     |    |
|                                  | Shrub/* <sup>1</sup>                                                                | Tree                                                                                 | Tree                                                                                  |
| <b>Thorn</b>                     |   |    |   |
|                                  | Thorn on leaves                                                                     | Thorn on tree                                                                        | Thorn on tree                                                                         |
| <b>Leaf type</b>                 |  |   |  |
|                                  | Odd-pinnately compound leaf                                                         | Even -pinnately compound leaf                                                        | Even-pinnately compound leaf                                                          |
| <b>Number of petals</b>          |  |  |  |
|                                  | 6-9 petals                                                                          | 4 petals                                                                             | 5 petals                                                                              |
| <b>Number of anthers</b>         |  |  |  |
|                                  | 4-8 anthers                                                                         | 3-4 anthers                                                                          | 5 anthers                                                                             |
| <b>Fresh fruit colour</b>        |  |   |  |

|                          |                                                                                   |                                                                                   |                                                                                     |
|--------------------------|-----------------------------------------------------------------------------------|-----------------------------------------------------------------------------------|-------------------------------------------------------------------------------------|
|                          | Red <sup>*2</sup>                                                                 | Red                                                                               | Greenish red                                                                        |
| <b>Dry fruit colour</b>  |  |  |  |
|                          | Brown                                                                             | Dark brown                                                                        | Brown                                                                               |
| <b>Scientific name**</b> | <i>Zanthoxylum armatum</i>                                                        | <i>Zanthoxylum rhetsa</i>                                                         | <i>Zanthoxylum myriacanthum</i>                                                     |

---

<sup>\*1</sup> online; [https://en.wikipedia.org/wiki/Zanthoxylum\\_armatum](https://en.wikipedia.org/wiki/Zanthoxylum_armatum)

<sup>2</sup> online; <https://www.flickr.com/photos/heliconius/15771073680>

\*\* the specimens were taxonomical confirmed by Queen Sirikit Botanic Garden, Chiang Mai, Thailand and as in Sriwichai *et al.*, [5].

**Table S2**

Floral and fruit characteristics of makhwaen collected from different locations (MK1-3)

| Part of Plant for classification | makhwaen (MK1)                                                                                   | makhwaen (MK2)                                                                                    | makhwaen (MK3)                                                                                     |
|----------------------------------|--------------------------------------------------------------------------------------------------|---------------------------------------------------------------------------------------------------|----------------------------------------------------------------------------------------------------|
| Number of petals                 | <br>5 petals    | <br>5 petals    | <br>5 petals    |
| Number of anthers                | <br>5 anthers   | <br>5 anthers   | <br>5 anthers   |
| Fruit structure                  | <br>3 capsules | <br>3 capsules | <br>3 capsules |

**Table S3**

Study site the sample collections

| Location                                                              | Coordinate                       | Altitude (m) | Picture of area                                                                      |
|-----------------------------------------------------------------------|----------------------------------|--------------|--------------------------------------------------------------------------------------|
| Papea, Mae Tang district, Chiang Mai province (MK1)                   | 19° 7' 27''N,<br>98° 42' 14'' E  | 924          |    |
| Pong Yang, Mae Rim district Chiang Mai province, (MK2)                | 18° 53' 24''N,<br>98° 49' 53''E  | 800          |    |
| Yod, Song Kwae district, Nan province (MK3)                           | 19° 22' 37''N,<br>100° 35' 49''E | 1,600        |   |
| Ban rak Thai Mok Champae, MOUNG district, Mae Hong Sorn province (HJ) | 19° 32' 32''N,<br>97° 53' 35.''E | 1,176        |  |
| Phichai, Mueang Lampang district, Lampang province (MKO)              | 18° 22' 11''N,<br>99° 35' 44''E  | 294          |  |

\* The points of sampling location are presented in red pin.\*\* Satellite images by Google Maps

**Table S4**

Sequence of RAPD primers

| Primer       | Sequence    | References |
|--------------|-------------|------------|
| <b>S6</b>    | TGCTCTGCCCC | [43]       |
| <b>S7</b>    | GGTGACGCAG  | [43]       |
| <b>S9</b>    | GCGTCGAGGG  | [43]       |
| <b>OPA01</b> | CAGGCCCTTC  | [44]       |
| <b>OPA04</b> | AATCGGGCTG  | [44]       |
| <b>OPN05</b> | AGGGGTCTTG  | [45]       |
| <b>OPN06</b> | GAGACGCACA  | [45]       |
| <b>OPN07</b> | CAGCCCAGAG  | [45])      |
| <b>OPN13</b> | AGCGTCACTC  | [46]       |
